# Supplementary material for: Situation of Physiotherapy Clinics in the Community of Madrid in Relation to the Concept of Sustainability: A Survey Study
Source: MDPI journal article supplement (doi:10.3390/su142416439), 2022-12-08
Supplement: s1 [file s1]

**Supplementary Material. Table S1.** Responses to the survey provided by the 52 clinics by type of clinic.

|                                                                                                              |               | More than 90 m <sup>2</sup> | Less than 90 m <sup>2</sup> | *p value | Cramer's V (95%CI) |
|--------------------------------------------------------------------------------------------------------------|---------------|-----------------------------|-----------------------------|----------|--------------------|
| n                                                                                                            |               | 34                          | 18                          |          |                    |
| Have you ever heard of sustainability in the field of physiotherapy?, n(%)                                   | No            | 23 (67.6)                   | 10 (55.6)                   | 0.576    | 0.119 (0, 1)       |
|                                                                                                              | Yes           | 11 (32.4)                   | 8 (44.4)                    |          |                    |
| Do you know the exact consumption of your clinic: electricity, heating, water, etc...?, n(%)                 | Approximately | 10 (29.4)                   | 7 (38.9)                    | 0.276    | 0.222 (0, 1)       |
|                                                                                                              | No            | 11 (32.4)                   | 8 (44.4)                    |          |                    |
|                                                                                                              | Yes           | 13 (38.2)                   | 3 (16.7)                    |          |                    |
| Have you heard of so-called "green electricity"?, n(%)                                                       | No            | 6 (17.6)                    | 8 (44.4)                    | 0.081    | 0.287 (0, 1)       |
|                                                                                                              | Yes           | 28 (82.4)                   | 10 (55.6)                   |          |                    |
| Do you know the origin of the electrical energy consumed in your clinic?, n(%)                               | No            | 21 (61.8)                   | 10 (55.6)                   | 0.891    | 0.06 (0, 1)        |
|                                                                                                              | Yes           | 13 (38.2)                   | 8 (44.4)                    |          |                    |
| Does your center have any light and electricity saving system (timers, low energy bulbs, LEDs, etc...?, n(%) | No            | 3 (8.8)                     | 1 (5.6)                     | 0.69     | 0.063 (0, 1)       |
|                                                                                                              | Yes           | 30 (88.2)                   | 17 (94.4)                   |          |                    |
|                                                                                                              | Missing data  | 1 (2.9)                     | 0 (0.0)                     |          |                    |
| Which of the following measures do you carry out in your clinic: control of luminous flux, n(%)              | No            | 18 (52.9)                   | 12 (66.7)                   | 0.51     | 0.132 (0, 1)       |
|                                                                                                              | Yes           | 16 (47.1)                   | 6 (33.3)                    |          |                    |
| Which of the following measures do you carry out in your clinic: elimination of standby, n(%)                | No            | 26 (76.5)                   | 14 (77.8)                   | >0.999   | 0.015 (0, 1)       |
|                                                                                                              | Yes           | 8 (23.5)                    | 4 (22.2)                    |          |                    |
| Which of the following measures do you carry out in your clinic: thermal control, n(%)                       | No            | 14 (41.2)                   | 8 (44.4)                    | >0.999   | 0.031 (0, 1)       |
|                                                                                                              | Yes           | 20 (58.8)                   | 10 (55.6)                   |          |                    |
| Which of the following measures do you carry out in your clinic: Choice of energy-efficient devices, n(%)    | No            | 17 (50.0)                   | 9 (50.0)                    | >0.999   | 0 (0, 1)           |
|                                                                                                              | Yes           | 17 (50.0)                   | 9 (50.0)                    |          |                    |
| Which of the following measures do you carry out in your clinic? Adequate ventilation, n(%)                  | No            | 9 (26.5)                    | 4 (22.2)                    | >0.999   | 0.047 (0, 1)       |
|                                                                                                              | Yes           | 25 (73.5)                   | 14 (77.8)                   |          |                    |

|                                                                                                                                                                                                                   |                       |           |           |        |              |
|-------------------------------------------------------------------------------------------------------------------------------------------------------------------------------------------------------------------|-----------------------|-----------|-----------|--------|--------------|
| Are there water consumption saving systems in your clinic (flow reducers, liquid flow automa-<br>tisms, toilet flushing with differentiated flow) ?, n(%)                                                         | No                    | 18 (52.9) | 13 (72.2) | 0.293  | 0.187 (0, 1) |
|                                                                                                                                                                                                                   | Yes                   | 16 (47.1) | 5 (27.8)  |        |              |
| Do you think you are sufficiently familiar with the classification of the waste generated at your<br>clinic? n(%)                                                                                                 | No                    | 5 (14.7)  | 2 (11.1)  | 0.684  | 0.121 (0, 1) |
|                                                                                                                                                                                                                   | It is not clear to me | 6 (17.6)  | 5 (27.8)  |        |              |
|                                                                                                                                                                                                                   | Yes                   | 23 (67.6) | 11 (61.1) |        |              |
| How do you consider your current management of biohazardous (hazardous or special) waste?<br>n(%)                                                                                                                 | Good                  | 14 (41.2) | 8 (44.4)  | 0.808  | 0.137 (0, 1) |
|                                                                                                                                                                                                                   | Insufficient          | 1 (2.9)   | 1 (5.6)   |        |              |
|                                                                                                                                                                                                                   | Very good             | 17 (50.0) | 7 (38.9)  |        |              |
|                                                                                                                                                                                                                   | Regular               | 2 (5.9)   | 2 (11.1)  |        |              |
| If you use heat pump/cooling air conditioning equipment (Splitz, portable, etc. ...) Do you know<br>the number of frigories that your clinic would need to achieve the most efficient air conditio-<br>ning? n(%) | No                    | 29 (85.3) | 15 (83.3) | >0.999 | 0.026 (0, 1) |
|                                                                                                                                                                                                                   | Yes                   | 5 (14.7)  | 3 (16.7)  |        |              |
| Do you carry out regular maintenance of the air conditioning systems?, n(%)                                                                                                                                       | No                    | 4 (11.8)  | 4 (22.2)  | 0.555  | 0.138 (0, 1) |
|                                                                                                                                                                                                                   | Yes                   | 30 (88.2) | 14 (77.8) |        |              |
| Do you use an environmentally friendly laundry system (biodegradable detergents, low toxi-<br>city, water and electricity efficient)? n(%)                                                                        | No                    | 20 (58.8) | 10 (55.6) | >0.999 | 0.031 (0, 1) |
|                                                                                                                                                                                                                   | Yes                   | 14 (41.2) | 8 (44.4)  |        |              |
| Do you try to use recycled materials as much as possible? n(%)                                                                                                                                                    | No                    | 10 (29.4) | 4 (22.2)  | 0.82   | 0.077 (0, 1) |
|                                                                                                                                                                                                                   | Yes                   | 24 (70.6) | 14 (77.8) |        |              |
| Do you use cleaning and disinfection products considered environmentally friendly? n(%)                                                                                                                           | No                    | 23 (67.6) | 17 (94.4) | 0.066  | 0.303 (0, 1) |
|                                                                                                                                                                                                                   | Yes                   | 11 (32.4) | 1 (5.6)   |        |              |
| Do you use your community's clean points to dispose of deteriorated lighting equipment (ultra-<br>violet, fluorescent, etc.) ?, n(%)                                                                              | No                    | 4 (11.8)  | 4 (22.2)  | 0.555  | 0.138 (0, 1) |
|                                                                                                                                                                                                                   | Yes                   | 30 (88.2) | 14 (77.8) |        |              |

|                                                                                                                                                                          |                                               |           |           |       |              |
|--------------------------------------------------------------------------------------------------------------------------------------------------------------------------|-----------------------------------------------|-----------|-----------|-------|--------------|
| Do you consider that taking care of the physical and mental health of your salaried physiotherapists should be part of a sustainable development project? n(%)           | I have never thought about it                 | 6 (17.6)  | 2 (11.1)  | 0.828 | 0.086 (0, 1) |
|                                                                                                                                                                          | Yes                                           | 28 (82.4) | 16 (88.9) |       |              |
| Do you know the Three Rs rule? Reduce, Reuse and Recycle, n(%)                                                                                                           | No                                            | 3 (8.8)   | 3 (16.7)  | 0.601 | 0.14 (0, 1)  |
|                                                                                                                                                                          | Yes, and I practice it                        | 25 (73.5) | 11 (61.1) |       |              |
|                                                                                                                                                                          | Yes, but I do not practice it                 | 6 (17.6)  | 4 (22.2)  |       |              |
| In which of the following areas of your clinic do you think you can improve from a sustainability point of view: Energy consumption , n(%)                               | No                                            | 18 (52.9) | 12 (66.7) | 0.51  | 0.132 (0, 1) |
|                                                                                                                                                                          | Yes                                           | 16 (47.1) | 6 (33.3)  |       |              |
| In which of the following areas of your clinic do you think you can improve from a sustainability point of view: Waste management, n(%)                                  | No                                            | 18 (52.9) | 12 (66.7) | 0.51  | 0.132 (0, 1) |
|                                                                                                                                                                          | Yes                                           | 16 (47.1) | 6 (33.3)  |       |              |
| In which of the following areas of your practice do you think you can improve from a sustainability point of view: Distribution of furniture, n(%)                       | No                                            | 18 (52.9) | 12 (66.7) | 0.51  | 0.132 (0, 1) |
|                                                                                                                                                                          | Yes                                           | 16 (47.1) | 6 (33.3)  |       |              |
| In which of the following areas of your practice do you think you can improve from a sustainability point of view: Decrease consumption of disposable material, n(%)     | No                                            | 18 (52.9) | 12 (66.7) | 0.51  | 0.132 (0, 1) |
|                                                                                                                                                                          | Yes                                           | 16 (47.1) | 6 (33.3)  |       |              |
| In which of the following areas of your practice do you think you can improve from a sustainability point of view: Improvements in the work system of my employees, n(%) | No                                            | 18 (52.9) | 12 (66.7) | 0.51  | 0.132 (0, 1) |
|                                                                                                                                                                          | Yes                                           | 16 (47.1) | 6 (33.3)  |       |              |
| Are you aware of the goals set out in the 2030 agenda for sustainable development, n(%)                                                                                  | It rings a bell, but I don't really know them | 6 (17.6)  | 7 (38.9)  | 0.197 | 0.25 (0, 1)  |
|                                                                                                                                                                          | No                                            | 23 (67.6) | 10 (55.6) |       |              |
|                                                                                                                                                                          | Yes                                           | 5 (14.7)  | 1 (5.6)   |       |              |

Data expressed as absolute and relative values (%); 95% confidence interval 95% CI. <sup>a</sup>significant if p<0.05.

**Supplementary Material Table S2.** Reliability with item removal.

|                                                                                                                                                                                         | $\alpha$ | $\alpha$ standardized | $\lambda_6$ |
|-----------------------------------------------------------------------------------------------------------------------------------------------------------------------------------------|----------|-----------------------|-------------|
| Have you ever heard of sustainability in the field of physical therapy?                                                                                                                 | 0.757    | 0.652                 | 0.995       |
| Do you know the exact consumption of your clinic, electricity, heating, water, etc.?                                                                                                    | 0.770    | 0.687                 | 0.988       |
| Have you heard of so-called "green electricity"?                                                                                                                                        | 0.788    | 0.711                 | 0.986       |
| Do you know the origin of the electrical energy consumed in your clinic?                                                                                                                | 0.763    | 0.664                 | 0.999       |
| Does your center have any light and electricity saving system (timers, low energy bulbs, LEDs, etc.)?                                                                                   | 0.734    | 0.641                 | 0.992       |
| Which of the following measures do you carry out in your clinic: Luminous flux control                                                                                                  | 0.719    | 0.618                 | 1.000       |
| Which of the following measures do you carry out in your clinic?                                                                                                                        | 0.790    | 0.719                 | 0.982       |
| Which of the following measures do you carry out in your clinic: Thermal control                                                                                                        | 0.748    | 0.639                 | 0.985       |
| Which of the following measures do you carry out in your clinic: Choice of energy efficient devices                                                                                     | 0.747    | 0.640                 | 0.994       |
| Which of the following measures do you carry out in your clinic: Adequate ventilation                                                                                                   | 0.771    | 0.685                 | 0.994       |
| Are there any water consumption saving systems in your clinic (flow reducers, liquid flow automations, toilet flushing with differentiated flow)?                                       | 0.771    | 0.678                 | 0.996       |
| Do you think you are sufficiently familiar with the classification of waste generated at your clinic?                                                                                   | 0.757    | 0.660                 | 0.989       |
| How do you consider your current management of bio-sanitary waste (hazardous or special)?                                                                                               | 0.776    | 0.702                 | 0.986       |
| If you use heat pump air conditioning equipment (Splitz, portable, etc. ....), do you know the number of frigories that your clinic would need for the most efficient air conditioning? | 0.748    | 0.645                 | 0.996       |
| Do you perform periodic maintenance of air conditioning systems?                                                                                                                        | 0.791    | 0.700                 | 0.981       |
| Do you use an environmentally friendly laundry system (biodegradable detergents, low toxicity, water and electricity efficient)?                                                        | 0.768    | 0.678                 | 0.986       |
| Do you try to use recycled materials as much as possible?                                                                                                                               | 0.798    | 0.720                 | 0.996       |
| Do you use cleaning and disinfection products considered environmentally friendly?                                                                                                      | 0.761    | 0.659                 | 0.992       |
| Do you use your community's clean points to dispose of deteriorated lighting equipment (ultraviolet, fluorescent, etc...)?                                                              | 0.775    | 0.678                 | 0.988       |
| Do you consider that taking care of the physical and mental health of your salaried physiotherapists should be part of a sustainable development project?                               | 0.764    | 0.672                 | 0.982       |
| Do you know the Three Wrongs rule? Reduce, Reuse and Recycle                                                                                                                            | 0.795    | 0.720                 | 0.984       |
| In which of the following areas of your clinic do you think you can improve from a sustainability point of view: Energy consumption                                                     | 0.719    | 0.618                 | 1.000       |
| In which of the following areas of your clinic do you think you can improve from a sustainability standpoint: Waste Management                                                          | 0.719    | 0.618                 | 1.000       |
| In which of the following areas of your clinic do you think you can improve from a sustainability point of view: Furniture distribution                                                 | 0.719    | 0.618                 | 1.000       |
| In which of the following areas of your clinic do you think you can improve from a sustainability point of view: Decrease consumption of disposable material.                           | 0.719    | 0.618                 | 1.000       |
| In which of the following areas of your clinic do you think you can improve from a sustainability point of view: Improvements in the work system of my employees.                       | 0.719    | 0.618                 | 1.000       |
| Are you aware of the goals set out in the 2030 agenda for sustainable development?                                                                                                      | 0.780    | 0.700                 | 0.982       |

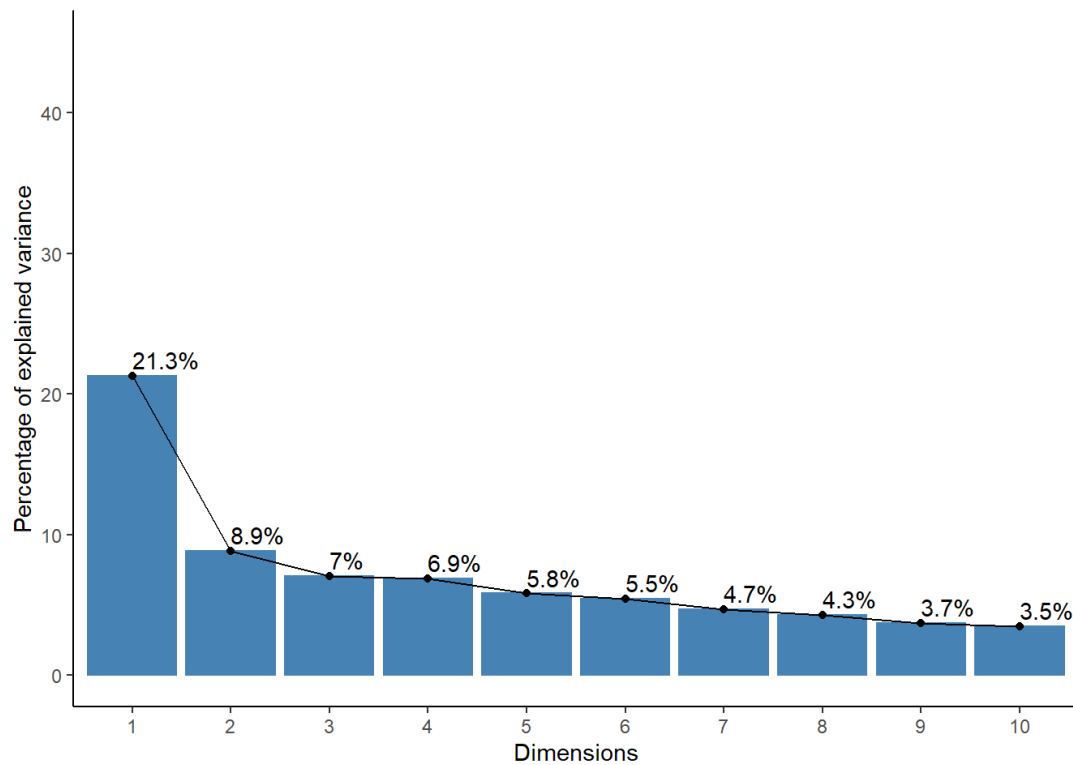

**Supplementary Material. Figure S1.** Percentage of inertia explained by each dimension.

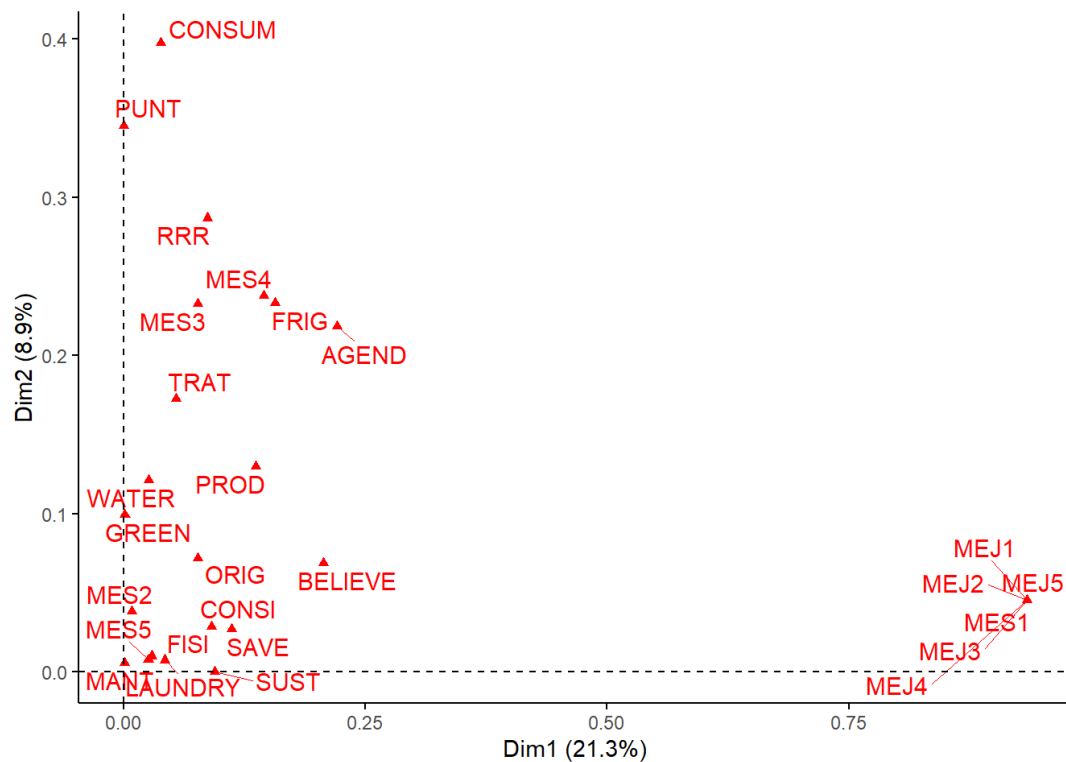

**Supplementary Material. Figure S2.** Contribution of the questions to the main dimensions.

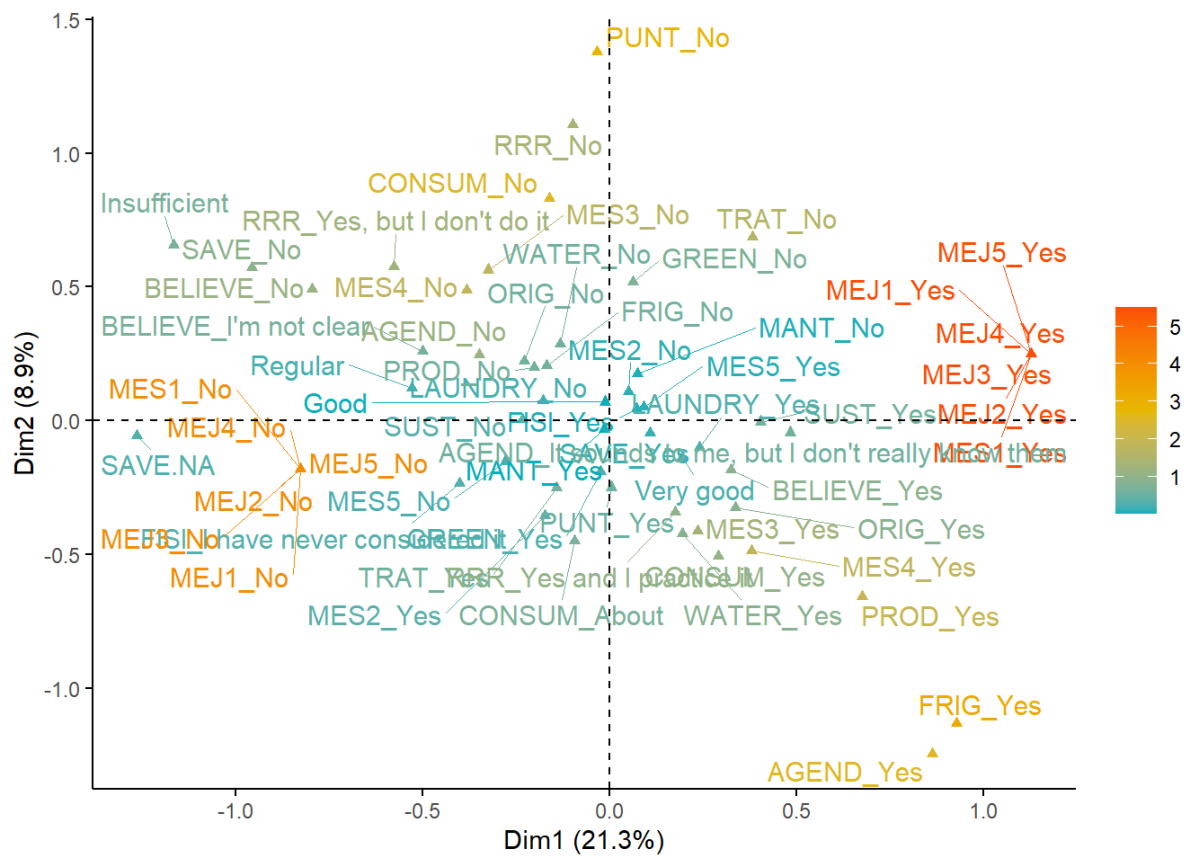

Supplementary Material. Figure S3. Contribution of the categories to the main dimensions.

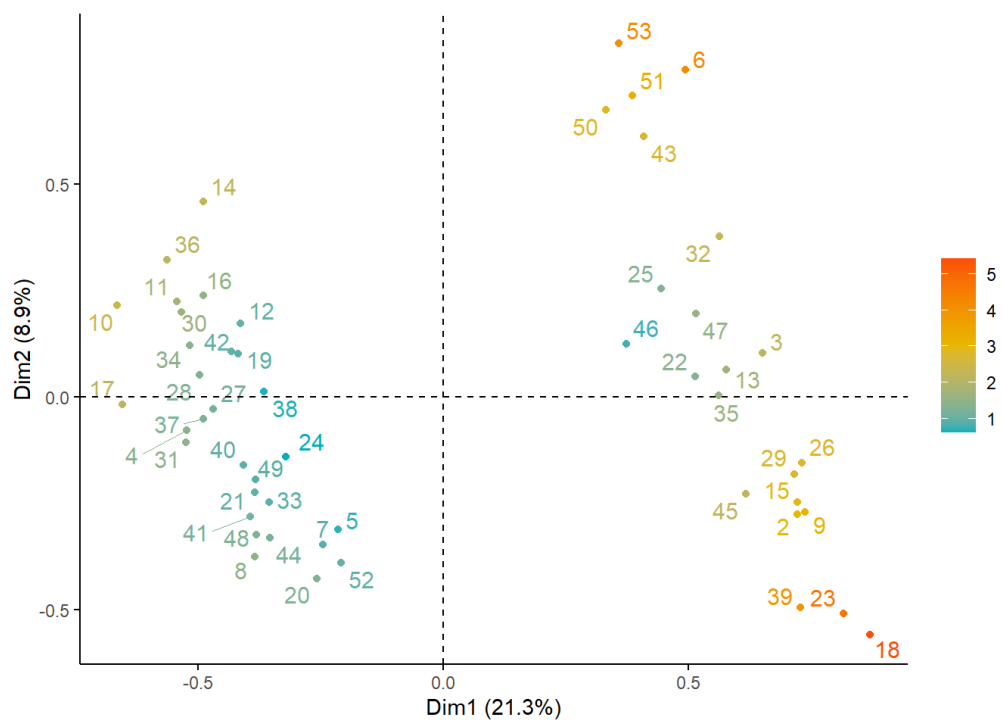

Supplementary Material. Figure S4. Contribution of the participants to the main dimensions.

| Supplementary Material Table S3. Sentiment and polarity analysis |                  |                                                                                                        |                 |          |                    |                                                                                                                                                                     |                 |          |                    |                                                           |                 |          |                       |                                                                                                                                                                                         |                 |          |                       |                                                                               |                 |          |                    |                                                                      |                 |          |                      |                                                        |                 |          |                       |                                                                                                                                                                                       |                 |          |                       |
|------------------------------------------------------------------|------------------|--------------------------------------------------------------------------------------------------------|-----------------|----------|--------------------|---------------------------------------------------------------------------------------------------------------------------------------------------------------------|-----------------|----------|--------------------|-----------------------------------------------------------|-----------------|----------|-----------------------|-----------------------------------------------------------------------------------------------------------------------------------------------------------------------------------------|-----------------|----------|-----------------------|-------------------------------------------------------------------------------|-----------------|----------|--------------------|----------------------------------------------------------------------|-----------------|----------|----------------------|--------------------------------------------------------|-----------------|----------|-----------------------|---------------------------------------------------------------------------------------------------------------------------------------------------------------------------------------|-----------------|----------|-----------------------|
|                                                                  |                  | If you answered yes to the previous question, please specify which electricity saving systems you use. |                 |          |                    | If your facility generates waste such as kerosene, creams, medicines, cosmetics, etc., please specify how you carry out the removal of these wastes in your clinic? |                 |          |                    | What type of heating/air conditioning systems do you use? |                 |          |                       | What made you make this choice of air conditioning / heating system, did you consider looking for a type of heating as sustainable as possible in relation to the environmental impact? |                 |          |                       | If you are aware of it, write down the cleaning products used in your clinic. |                 |          |                    | Which of the 17 Sustainable Development Goals are you familiar with? |                 |          |                      | Which of these Agenda 2030 goals apply to your clinic? |                 |          |                       | Would you be willing to implement the necessary sustainability measures in the clinic to further adapt to the 2030 agenda? If yes, please define briefly the measures you would adapt |                 |          |                       |
|                                                                  |                  |                                                                                                        |                 |          |                    |                                                                                                                                                                     |                 |          |                    |                                                           |                 |          |                       |                                                                                                                                                                                         |                 |          |                       |                                                                               |                 |          |                    |                                                                      |                 |          |                      |                                                        |                 |          |                       |                                                                                                                                                                                       |                 |          |                       |
|                                                                  |                  | More than 90 m²                                                                                        | Less than 90 m² | *p value | Cramer's V (95%CI) | More than 90 m²                                                                                                                                                     | Less than 90 m² | *p value | Cramer's V (95%CI) | More than 90 m²                                           | Less than 90 m² | *p value | Cramer's V (95%CI)    | More than 90 m²                                                                                                                                                                         | Less than 90 m² | *p value | Cramer's V (95%CI)    | More than 90 m²                                                               | Less than 90 m² | *p value | Cramer's V (95%CI) | More than 90 m²                                                      | Less than 90 m² | *p value | Cramer's V (95%CI)   | More than 90 m²                                        | Less than 90 m² | *p value | Cramer's V (95%CI)    | More than 90 m²                                                                                                                                                                       | Less than 90 m² | *p value | Cramer's V (95%CI)    |
| NRC Dictionary                                                   | Negative (%)     | 50.0                                                                                                   | 57.1            | >0.999   | 0.07 (0, 1)        | 58.6                                                                                                                                                                | 0.0             | 0.002    | 0.541 (0, 1)       | 91.3                                                      | 76.5            | 0.395    | 0.205 (0, 1)          | 9.1                                                                                                                                                                                     | 14.3            | 0.882    | 0.081 (0, 1)          | 100.0                                                                         | 0.0             | 0.402    | 1 (NaN, 1)         | 28.6                                                                 | 25.0            | >0.999   | 0.039 (0, 1)         | 14.3                                                   | 0.0             | 0.964    | 0.205 (0, 1)          | 12.7                                                                                                                                                                                  | 17.9            | 0.746    | 0.068 (0, 1)          |
|                                                                  | Positive (%)     | 50.0                                                                                                   | 42.9            |          |                    | 41.4                                                                                                                                                                | 100.0           |          |                    | 8.7                                                       | 23.5            |          |                       | 90.9                                                                                                                                                                                    | 85.7            |          |                       | 0.0                                                                           | 100.0           |          |                    | 71.4                                                                 | 75.0            |          |                      | 85.7                                                   | 100.0           |          |                       | 87.3                                                                                                                                                                                  | 82.1            |          |                       |
|                                                                  | Joy (%)          | 18.8                                                                                                   | 0.0             | 0.374    | 0.568 (0, 1)       | 10.3                                                                                                                                                                | 35.7            | 0.008    | 0.638 (0, 1)       | 5.1                                                       | 11.5            | 0.874    | 0.194 (0, 1)          | 7.1                                                                                                                                                                                     | 15.4            | 0.626    | 0.313 (0, 1)          |                                                                               |                 |          | 1 (NaN, 1)         | 10.7                                                                 | 6.2             | 0.366    | 0.385 (0, 1)         | 23.8                                                   | 0.0             | 0.377    | 0.548 (0, 1)          | 9.3                                                                                                                                                                                   | 8.0             | 0.792    | 0.239 (0, 1)          |
|                                                                  | Anticipation (%) | 12.5                                                                                                   | 50.0            |          |                    | 17.2                                                                                                                                                                | 28.6            |          |                    |                                                           |                 |          |                       | 28.6                                                                                                                                                                                    | 23.1            |          |                       | 100.0                                                                         | 0.0             | 0.135    |                    | 0.0                                                                  | 12.5            |          |                      | 14.3                                                   | 25.0            |          |                       | 20.9                                                                                                                                                                                  | 20.0            |          |                       |
|                                                                  | Confidence (%)   | 18.8                                                                                                   | 0.0             |          |                    | 10.3                                                                                                                                                                | 21.4            |          |                    | 2.6                                                       | 0.0             |          |                       | 46.4                                                                                                                                                                                    | 38.5            |          |                       | 0.0                                                                           | 50.0            |          |                    | 28.6                                                                 | 37.5            |          |                      | 38.1                                                   | 50.0            |          |                       | 34.9                                                                                                                                                                                  | 28.0            |          |                       |
|                                                                  | Dislike (%)      |                                                                                                        |                 |          |                    | 31.0                                                                                                                                                                | 0.0             |          |                    | 2.6                                                       | 0.0             |          |                       | 10.7                                                                                                                                                                                    | 3.8             |          |                       | 0.0                                                                           | 50.0            |          |                    | 10.7                                                                 | 18.8            |          |                      | 0.0                                                    | 25.0            |          |                       | 4.7                                                                                                                                                                                   | 16.0            |          |                       |
|                                                                  | Anger (%)        | 12.5                                                                                                   | 0.0             |          |                    |                                                                                                                                                                     |                 |          |                    | 23.1                                                      | 19.2            |          |                       | 0.0                                                                                                                                                                                     | 3.8             |          |                       |                                                                               |                 |          |                    | 14.3                                                                 | 12.5            |          |                      | 4.8                                                    | 0.0             |          |                       | 4.7                                                                                                                                                                                   | 8.0             |          |                       |
|                                                                  | Fear (%)         | 12.5                                                                                                   | 25.0            |          |                    | 10.3                                                                                                                                                                | 0.0             |          |                    | 20.5                                                      | 19.2            |          |                       | 0.0                                                                                                                                                                                     | 3.8             |          |                       |                                                                               |                 |          |                    | 21.4                                                                 | 6.2             |          |                      | 9.5                                                    | 0.0             |          |                       | 14.0                                                                                                                                                                                  | 8.0             |          |                       |
|                                                                  | Surprise (%)     | 18.8                                                                                                   | 0.0             |          |                    | 0.0                                                                                                                                                                 | 14.3            |          |                    | 25.6                                                      | 30.8            |          |                       | 7.1                                                                                                                                                                                     | 7.7             |          |                       |                                                                               |                 |          |                    |                                                                      |                 |          |                      | 4.8                                                    | 0.0             |          |                       | 7.0                                                                                                                                                                                   | 4.0             |          |                       |
|                                                                  | Sadness (%)      | 6.2                                                                                                    | 25.0            |          |                    | 20.7                                                                                                                                                                | 0.0             |          |                    | 20.5                                                      | 19.2            |          |                       | 0.0                                                                                                                                                                                     | 3.8             |          |                       |                                                                               |                 |          |                    | 14.3                                                                 | 6.2             |          |                      | 4.8                                                    | 0.0             |          |                       | 4.7                                                                                                                                                                                   | 8.0             |          |                       |
| Afinn Dictionary                                                 | Negative (%)     | 57.1                                                                                                   | 50.0            | >0.999   | 0.069 (0, 1)       | 70.6                                                                                                                                                                | 73.3            | >0.999   | 0.03 (0, 1)        | 44.4                                                      | 45.5            | >0.999   | 0.01 (0, 1)           | 58.6                                                                                                                                                                                    | 45.5            | 0.695    | 0.118 (0, 1)          | 50.0                                                                          | 0.0             | >0.999   | 0.5 (0, 1)         | 89.5                                                                 | 76.9            | 0.642    | 0.17 (0, 1)          | 91.3                                                   | 72.7            | 0.361    | 0.245 (0, 1)          | 26.8                                                                                                                                                                                  | 27.3            | >0.999   | 0.005 (0, 1)          |
|                                                                  | Positive (%)     | 42.9                                                                                                   | 50.0            |          |                    | 29.4                                                                                                                                                                | 26.7            |          |                    | 55.6                                                      | 54.5            |          |                       | 41.4                                                                                                                                                                                    | 54.5            |          |                       | 50.0                                                                          | 100.0           |          |                    | 10.5                                                                 | 23.1            |          |                      | 8.7                                                    | 27.3            |          |                       | 73.2                                                                                                                                                                                  | 72.7            |          |                       |
|                                                                  | Score of -1 (%)  | 57.1                                                                                                   | 25.0            | 0.475    | 0.477 (0, 1)       | 70.6                                                                                                                                                                | 73.3            | 0.631    | 0.17 (0, 1)        | 44.4                                                      | 45.5            | 0.726    | 0.149 (0, 1)          | 51.7                                                                                                                                                                                    | 45.5            | 0.696    | 0.19 (0, 1)           | 50.0                                                                          | 0.0             | >0.999   | 0.5 (0, 1)         | 73.7                                                                 | 61.5            | 0.422    | 0.296 (0, 1)         | 91.3                                                   | 72.7            | 0.129    | 0.347 (0, 1)          | 26.8                                                                                                                                                                                  | 27.3            | 0.734    | 0.128 (0, 1)          |
|                                                                  | Score of -2 (%)  | 0.0                                                                                                    | 25.0            |          |                    |                                                                                                                                                                     |                 |          |                    |                                                           |                 |          |                       | 6.9                                                                                                                                                                                     | 0.0             |          |                       |                                                                               |                 |          |                    | 15.8                                                                 | 15.4            |          |                      |                                                        |                 |          |                       |                                                                                                                                                                                       |                 |          |                       |
|                                                                  | Score of 1 (%)   | 14.3                                                                                                   | 25.0            |          |                    | 23.5                                                                                                                                                                | 13.3            |          |                    | 5.6                                                       | 0.0             |          |                       | 37.9                                                                                                                                                                                    | 45.5            |          |                       |                                                                               |                 |          |                    | 5.3                                                                  | 0.0             |          |                      |                                                        |                 |          |                       | 60.7                                                                                                                                                                                  | 63.6            |          |                       |
|                                                                  | Score of 2 (%)   | 28.6                                                                                                   | 25.0            |          |                    | 5.9                                                                                                                                                                 | 13.3            |          |                    | 50.0                                                      | 54.5            |          |                       | 3.4                                                                                                                                                                                     | 9.1             |          |                       | 50.0                                                                          | 100.0           |          |                    | 5.3                                                                  | 23.1            |          |                      | 4.3                                                    | 27.3            |          |                       | 7.1                                                                                                                                                                                   | 9.1             |          |                       |
|                                                                  | Score of 3 (%)   |                                                                                                        |                 |          |                    |                                                                                                                                                                     |                 |          |                    |                                                           |                 |          |                       |                                                                                                                                                                                         |                 |          |                       |                                                                               |                 |          |                    |                                                                      |                 |          |                      | 4.3                                                    | 0.0             |          |                       | 5.4                                                                                                                                                                                   | 0.0             |          |                       |
| Bing Dictionary                                                  | Negative (%)     | 62.5                                                                                                   | 80.0            | 0.962    | 0.184 (0, 1)       | 93.8                                                                                                                                                                | 0.0             | 0.221    | 0.685 (0, 1)       | 72.2                                                      | 73.9            | >0.999   | 0.019 (0, 1)          | 12.9                                                                                                                                                                                    | 18.2            | >0.999   | 0.066 (0, 1)          | 66.7                                                                          | 0.0             | 0.156    | 0.756 (0, 1)       | 25.0                                                                 | 20.0            | >0.999   | 0.056 (0, 1)         | 25.0                                                   | 0.0             | 0.353    | 0.265 (0, 1)          | 17.4                                                                                                                                                                                  | 26.7            | 0.781    | 0.111 (0, 1)          |
|                                                                  | Positive (%)     | 37.5                                                                                                   | 20.0            |          |                    | 6.2                                                                                                                                                                 | 100.0           |          |                    | 27.8                                                      | 26.1            |          |                       | 87.1                                                                                                                                                                                    | 81.8            |          |                       | 33.3                                                                          | 100.0           |          |                    | 75.0                                                                 | 80.0            |          |                      | 75.0                                                   | 100.0           |          |                       | 82.6                                                                                                                                                                                  | 73.3            |          |                       |
| Polarity of sentences                                            |                  | -0.00±0.09                                                                                             | -0.04±0.17      | 0.425    | 0.112 (0, 0.342)*  | -0.05±0.22                                                                                                                                                          | -0.01±0.05      | 0.91     | 0.016 (0, 0.263)*  | -0.07±0.23                                                | -0.07±0.17      | 0.824    | 0.031 (0.008, 0.294)* | 0.10±0.50                                                                                                                                                                               | 0.08±0.37       | 0.572    | 0.078 (0.005, 0.319)* | -0.04±0.30                                                                    | 0.16±0.39       | 0.28     |                    | 0.01±0.21                                                            | 0.19±0.51       | 0.405    | 0.12 (0.004, 0.394)* | -0.04±0.33                                             | 0.25±0.46       | 0.047    | 0.287 (0.079, 0.552)* | 0.03±0.18                                                                                                                                                                             | 0.07±0.40       | 0.61     | 0.072 (0.002, 0.282)* |

Data expressed as mean ± standard deviation or with relative values (%); 95% confidence interval; \*nonparametric r effect size. ^significant if p<0.05.

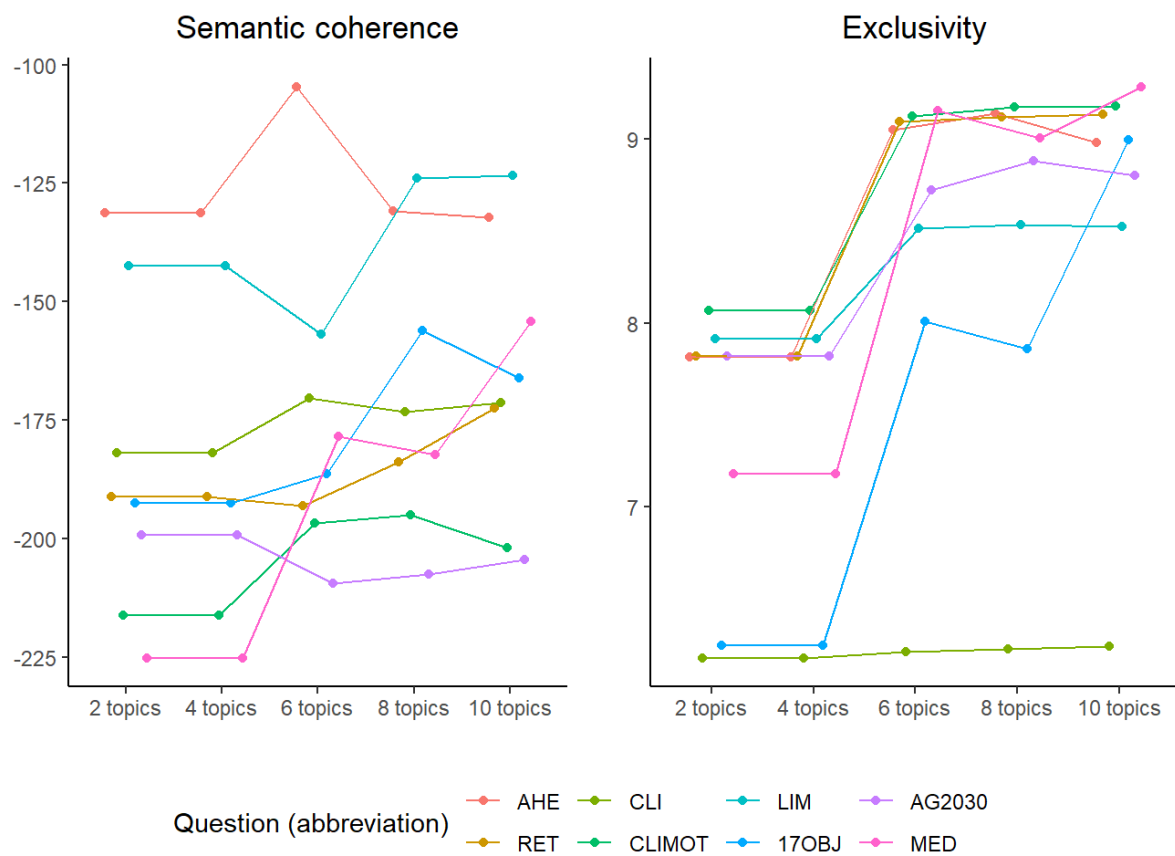

**Supplementary Material. Figure S5.** Semantic coherence and exclusivity of each question.

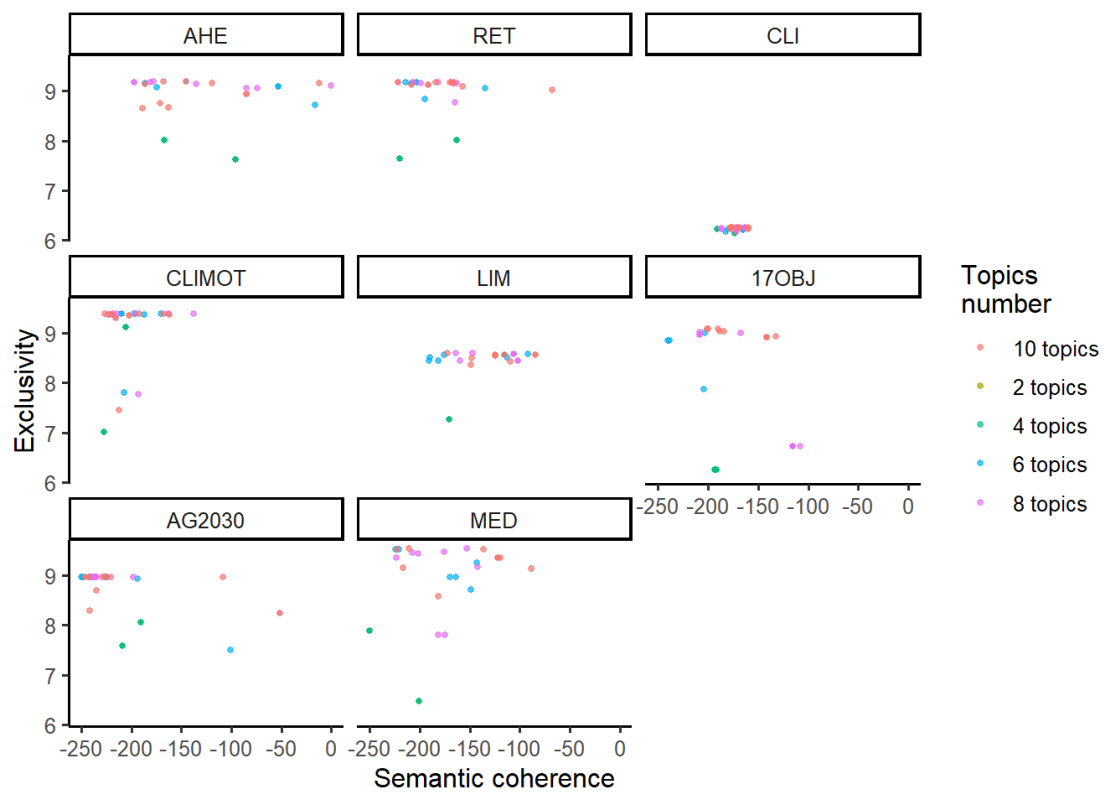

**Supplementary Material. Figure S6:** Exclusivity vs. semantic coherence.



Supplementary Material. Table S4. Analysis of qualitative coding by type of clinic.

| If you answered yes to the previous question, please, could you specify which electricity saving systems you use |           | If your center generates waste such as paraffin, creams, medicines, cosmetics, etc..... please? Could you specify how you carry out the removal of this waste in your center? |                 |          |                    |                                           |                 |            |                    | What type of heating/air conditioning systems do you use? |                            |           |                    | Did you consider looking for a type of heating that is as sustainable as possible in relation to the environmental impact? |                 |                                              |                    | If you are aware of it, write down the cleaning products used in your clinic |                                          |              |                           | Which of the 17 Sustainable Development Goals are you familiar with? |                 |                                                  |                                       | Which of these Agenda 2030 goals apply to your clinic? |                 |              |                              | Would you be willing to implement the necessary sustainability measures in the clinic to further adapt to the 2040 agenda? If yes, please briefly define the measures that you would adapt |                                                           |            |                    |                                    |                                 |                                                                 |           |              |          |              |
|------------------------------------------------------------------------------------------------------------------|-----------|-------------------------------------------------------------------------------------------------------------------------------------------------------------------------------|-----------------|----------|--------------------|-------------------------------------------|-----------------|------------|--------------------|-----------------------------------------------------------|----------------------------|-----------|--------------------|----------------------------------------------------------------------------------------------------------------------------|-----------------|----------------------------------------------|--------------------|------------------------------------------------------------------------------|------------------------------------------|--------------|---------------------------|----------------------------------------------------------------------|-----------------|--------------------------------------------------|---------------------------------------|--------------------------------------------------------|-----------------|--------------|------------------------------|--------------------------------------------------------------------------------------------------------------------------------------------------------------------------------------------|-----------------------------------------------------------|------------|--------------------|------------------------------------|---------------------------------|-----------------------------------------------------------------|-----------|--------------|----------|--------------|
|                                                                                                                  |           |                                                                                                                                                                               |                 |          |                    |                                           |                 |            |                    |                                                           |                            |           |                    |                                                                                                                            |                 |                                              |                    |                                                                              |                                          |              |                           |                                                                      |                 |                                                  |                                       |                                                        |                 |              |                              |                                                                                                                                                                                            |                                                           |            |                    |                                    |                                 |                                                                 |           |              |          |              |
|                                                                                                                  |           | More than 90 m²                                                                                                                                                               | Less than 90 m² | *p value | Cramer's V (95%CI) | More than 90 m²                           | Less than 90 m² | *p value   | Cramer's V (95%CI) | More than 90 m²                                           | Less than 90 m²            | *p value  | Cramer's V (95%CI) | More than 90 m²                                                                                                            | Less than 90 m² | *p value                                     | Cramer's V (95%CI) | More than 90 m²                                                              | Less than 90 m²                          | *p value     | Cramer's V (95%CI)        | More than 90 m²                                                      | Less than 90 m² | *p value                                         | Cramer's V (95%CI)                    | More than 90 m²                                        | Less than 90 m² | *p value     | Cramer's V (95%CI)           | More than 90 m²                                                                                                                                                                            | Less than 90 m²                                           | *p value   | Cramer's V (95%CI) |                                    |                                 |                                                                 |           |              |          |              |
| Number of coded segments                                                                                         |           | 32                                                                                                                                                                            | 18              |          |                    | 34                                        | 18              |            |                    | 33                                                        | 18                         |           |                    | 34                                                                                                                         | 18              |                                              |                    | 11                                                                           | 6                                        |              |                           | 33                                                                   | 15              |                                                  |                                       | 33                                                     | 15              |              |                              | 34                                                                                                                                                                                         | 17                                                        |            |                    |                                    |                                 |                                                                 |           |              |          |              |
| Regulators and thermostats, n(%)                                                                                 | Coded     | 1 (3.1)                                                                                                                                                                       | 3 (16.7)        | 0.25     | 0.24 (0, 1)        | Clean point, n(%)                         | 6 (17.6)        | 3 (16.7)   | >0.999             | 0.012 (0, 1)                                              | Electric radiator, n(%)    | 4 (12.1)  | 3 (16.7)           | 0.98                                                                                                                       | 0.063 (0, 1)    | No other systems available, n(%)             | 5 (14.7)           | 2 (11.1)                                                                     | >0.999                                   | 0.05 (0, 1)  | Bleach, n(%)              | 0 (0.0)                                                              | 4 (66.7)        | 0.012                                            | 0.751 (0, 1)                          | Awareness of all objectives, n(%)                      | 0 (0.0)         | 2 (13.3)     | 0.173                        | 0.309 (0, 1)                                                                                                                                                                               | Recycle, n(%)                                             | 1 (3.0)    | 1 (6.7)            | >0.999                             | 0.084 (0, 1)                    | Economic and labor conditions, n(%)                             | 5 (14.7)  | 2 (11.8)     | >0.999   | 0.04 (0, 1)  |
|                                                                                                                  | Not coded | 31 (96.9)                                                                                                                                                                     | 15 (83.3)       |          |                    |                                           | 28 (82.4)       | 15 (83.3)  |                    |                                                           |                            | 29 (87.9) | 15 (83.3)          |                                                                                                                            |                 |                                              | 29 (85.3)          | 16 (88.9)                                                                    |                                          |              |                           | 11 (100.0)                                                           | 2 (33.3)        |                                                  |                                       |                                                        | 33 (100.0)      | 13 (86.7)    |                              |                                                                                                                                                                                            | 32 (97.0)                                                 | 14 (93.3)  |                    |                                    | 29 (85.3)                       | 15 (88.2)                                                       |           |              |          |              |
| Timers, n(%)                                                                                                     | Coded     | 8 (25.0)                                                                                                                                                                      | 5 (27.8)        | >0.999   | 0.03 (0, 1)        | No action taken, n(%)                     | 5 (14.7)        | 6 (33.3)   | 0.227              | 0.217 (0, 1)                                              | Heat-cooling pump, n(%)    | 15 (45.5) | 7 (38.9)           | 0.876                                                                                                                      | 0.063 (0, 1)    | No knowledge of other systems, n(%)          | 1 (2.9)            | 1 (5.6)                                                                      | >0.999                                   | 0.065 (0, 1) | Disinfectants, n(%)       | 3 (27.3)                                                             | 3 (50.0)        | 0.685                                            | 0.227 (0, 1)                          | Recycle, n(%)                                          | 1 (3.0)         | 2 (13.3)     | 0.469                        | 0.197 (0, 1)                                                                                                                                                                               | No knowledge of the measures, n(%)                        | 23 (69.7)  | 7 (46.7)           | 0.228                              | 0.22 (0, 1)                     | Will implement them but do not know what measures to take, n(%) | 16 (47.1) | 5 (29.4)     | 0.365    | 0.169 (0, 1) |
|                                                                                                                  | Not coded | 24 (75.0)                                                                                                                                                                     | 13 (72.2)       |          |                    |                                           | 29 (85.3)       | 12 (66.7)  |                    |                                                           |                            | 18 (54.5) | 11 (61.1)          |                                                                                                                            |                 |                                              | 33 (97.1)          | 17 (94.4)                                                                    |                                          |              |                           | 8 (72.7)                                                             | 3 (50.0)        |                                                  |                                       |                                                        | 32 (97.0)       | 13 (86.7)    |                              |                                                                                                                                                                                            | 10 (30.3)                                                 | 8 (53.3)   |                    |                                    | 18 (52.9)                       | 12 (70.6)                                                       |           |              |          |              |
| LED and energy-saving lights, n(%)                                                                               | Coded     | 27 (84.4)                                                                                                                                                                     | 17 (94.4)       | 0.55     | 0.149 (0, 1)       | Specialized company, n(%)                 | 8 (23.5)        | 3 (16.7)   | 0.826              | 0.08 (0, 1)                                               | Gas heating, n(%)          | 3 (9.1)   | 1 (5.6)            | >0.999                                                                                                                     | 0.063 (0, 1)    | System already installed in the center, n(%) | 7 (20.6)           | 5 (27.8)                                                                     | 0.811                                    | 0.081 (0, 1) | Ammonia, n(%)             | 0 (0.0)                                                              | 1 (16.7)        | 0.751                                            | 0.339 (0, 1)                          | Little or no knowledge of objectives, n(%)             | 26 (78.8)       | 8 (53.3)     | 0.145                        | 0.26 (0, 1)                                                                                                                                                                                | None of the measures applied, n(%)                        | 5 (15.2)   | 2 (13.3)           | >0.999                             | 0.024 (0, 1)                    | Laundry management, n(%)                                        | 0 (0.0)   | 1 (5.9)      | 0.721    | 0.2 (0, 1)   |
|                                                                                                                  | Not coded | 5 (15.6)                                                                                                                                                                      | 1 (5.6)         |          |                    |                                           | 26 (76.5)       | 15 (83.3)  |                    |                                                           |                            | 30 (90.9) | 17 (94.4)          |                                                                                                                            |                 |                                              | 27 (79.4)          | 13 (72.2)                                                                    |                                          |              |                           | 11 (100.0)                                                           | 5 (83.3)        |                                                  |                                       |                                                        | 7 (21.2)        | 7 (46.7)     |                              |                                                                                                                                                                                            | 28 (84.8)                                                 | 13 (86.7)  |                    |                                    | 34 (100.0)                      | 16 (94.1)                                                       |           |              |          |              |
| Use of natural light, n(%)                                                                                       | Coded     | 2 (6.2)                                                                                                                                                                       | 1 (5.6)         | >0.999   | 0.014 (0, 1)       | Sorting containers, n(%)                  | 8 (23.5)        | 3 (16.7)   | 0.826              | 0.08 (0, 1)                                               | Central heating, n(%)      | 5 (15.2)  | 1 (5.6)            | 0.574                                                                                                                      | 0.142 (0, 1)    | Considered but not installed, n(%)           | 2 (5.9)            | 0 (0.0)                                                                      | 0.771                                    | 0.146 (0, 1) | Soap and detergents, n(%) | 2 (18.2)                                                             | 1 (16.7)        | >0.999                                           | 0.019 (0, 1)                          | Opinion that they are deficient, n(%)                  | 0 (0.0)         | 1 (6.7)      | 0.683                        | 0.216 (0, 1)                                                                                                                                                                               | Sustainability and responsible consumption measures, n(%) | 2 (6.1)    | 1 (6.7)            | >0.999                             | 0.012 (0, 1)                    | Would not apply any measure, n(%)                               | 4 (11.8)  | 2 (11.8)     | >0.999   | 0 (0, 1)     |
|                                                                                                                  | Not coded | 30 (93.8)                                                                                                                                                                     | 17 (94.4)       |          |                    |                                           | 26 (76.5)       | 15 (83.3)  |                    |                                                           |                            | 28 (84.8) | 17 (94.4)          |                                                                                                                            |                 |                                              | 32 (94.1)          | 18 (100.0)                                                                   |                                          |              |                           | 9 (81.8)                                                             | 5 (83.3)        |                                                  |                                       |                                                        | 33 (100.0)      | 14 (93.3)    |                              |                                                                                                                                                                                            | 31 (93.9)                                                 | 14 (93.3)  |                    |                                    | 30 (88.2)                       | 15 (88.2)                                                       |           |              |          |              |
| No action taken, n(%)                                                                                            | Coded     | 4 (12.5)                                                                                                                                                                      | 2 (11.1)        | >0.999   | 0.021 (0, 1)       | Do not generate biohazardous waste, n(%)  | 8 (23.5)        | 5 (27.8)   | >0.999             | 0.047 (0, 1)                                              | Air conditioning, n(%)     | 12 (36.4) | 8 (44.4)           | 0.791                                                                                                                      | 0.079 (0, 1)    | Cleanliness of energy source, n(%)           | 1 (2.9)            | 1 (5.6)                                                                      | >0.999                                   | 0.065 (0, 1) | Organic products, n(%)    | 4 (36.4)                                                             | 1 (16.7)        | 0.768                                            | 0.207 (0, 1)                          | Clean energy, n(%)                                     | 3 (9.1)         | 0 (0.0)      | 0.574                        | 0.174 (0, 1)                                                                                                                                                                               | Reduction of inequalities, n(%)                           | 1 (3.0)    | 0 (0.0)            | >0.999                             | 0.098 (0, 1)                    | Fight against climate change, n(%)                              | 1 (2.9)   | 0 (0.0)      | >0.999   | 0.1 (0, 1)   |
|                                                                                                                  | Not coded | 28 (87.5)                                                                                                                                                                     | 16 (88.9)       |          |                    |                                           | 26 (76.5)       | 13 (72.2)  |                    |                                                           |                            | 21 (63.6) | 10 (55.6)          |                                                                                                                            |                 |                                              | 33 (97.1)          | 17 (94.4)                                                                    |                                          |              |                           | 7 (63.6)                                                             | 5 (83.3)        |                                                  |                                       |                                                        | 30 (90.9)       | 15 (100.0)   |                              |                                                                                                                                                                                            | 32 (97.0)                                                 | 15 (100.0) |                    |                                    | 33 (97.1)                       | 17 (100.0)                                                      |           |              |          |              |
| Energy efficient appliances, n(%)                                                                                | Coded     | 2 (6.2)                                                                                                                                                                       | 1 (5.6)         | >0.999   | 0.014 (0, 1)       | Do not know what measures are taken, n(%) | 1 (2.9)         | 0 (0.0)    | >0.999             | 0.102 (0, 1)                                              | Biodegradable source, n(%) | 1 (3.0)   | 0 (0.0)            | >0.999                                                                                                                     | 0.104 (0, 1)    | No choice raised, n(%)                       | 7 (20.6)           | 2 (11.1)                                                                     | 0.635                                    | 0.119 (0, 1) | Glass cleaner, n(%)       | 1 (9.1)                                                              | 0 (0.0)         | >0.999                                           | 0.185 (0, 1)                          | Gender equality, n(%)                                  | 2 (6.1)         | 1 (6.7)      | >0.999                       | 0.012 (0, 1)                                                                                                                                                                               | Improving health and well-being, n(%)                     | 2 (6.1)    | 1 (6.7)            | >0.999                             | 0.012 (0, 1)                    | Social improvements, n(%)                                       | 1 (2.9)   | 0 (0.0)      | >0.999   | 0.1 (0, 1)   |
|                                                                                                                  | Not coded | 30 (93.8)                                                                                                                                                                     | 17 (94.4)       |          |                    |                                           | 33 (97.1)       | 18 (100.0) |                    |                                                           |                            | 32 (97.0) | 18 (100.0)         |                                                                                                                            |                 |                                              | 27 (79.4)          | 16 (88.9)                                                                    |                                          |              |                           | 10 (90.9)                                                            | 6 (100.0)       |                                                  |                                       |                                                        | 31 (93.9)       | 14 (93.3)    |                              |                                                                                                                                                                                            | 31 (93.9)                                                 | 14 (93.3)  |                    |                                    | 33 (97.1)                       | 17 (100.0)                                                      |           |              |          |              |
| Structural insulation, n(%)                                                                                      | Coded     | 1 (3.1)                                                                                                                                                                       | 0 (0.0)         | >0.999   | 0.107 (0, 1)       |                                           |                 |            |                    |                                                           |                            |           |                    | Architectural conditions, n(%)                                                                                             | 3 (8.8)         | 2 (11.1)                                     | >0.999             | 0.037 (0, 1)                                                                 | Generic and economic products, n(%)      | 0 (0.0)      | 1 (16.7)                  | 0.751                                                                | 0.339 (0, 1)    | Sustainability and responsible consumption, n(%) | 2 (6.1)                               | 2 (13.3)                                               | 0.778           | 0.122 (0, 1) | Gender equality, n(%)        | 1 (3.0)                                                                                                                                                                                    | 0 (0.0)                                                   | >0.999     | 0.098 (0, 1)       | No knowledge of the measures, n(%) | 11 (32.4)                       | 4 (23.5)                                                        | 0.744     | 0.091 (0, 1) |          |              |
|                                                                                                                  | Not coded | 31 (96.9)                                                                                                                                                                     | 18 (100.0)      |          |                    |                                           |                 |            |                    |                                                           |                            |           |                    |                                                                                                                            | 31 (91.2)       | 16 (88.9)                                    |                    |                                                                              |                                          | 11 (100.0)   | 5 (83.3)                  |                                                                      |                 |                                                  | 31 (93.9)                             | 13 (86.7)                                              |                 |              | 32 (97.0)                    | 15 (100.0)                                                                                                                                                                                 |                                                           |            | 23 (67.6)          | 13 (76.5)                          |                                 |                                                                 |           |              |          |              |
| Biodegradable sources, n(%)                                                                                      | Coded     | 1 (3.1)                                                                                                                                                                       | 0 (0.0)         | >0.999   | 0.107 (0, 1)       |                                           |                 |            |                    |                                                           |                            |           |                    | Energy efficiency and lower cost, n(%)                                                                                     | 8 (23.5)        | 5 (27.8)                                     | >0.999             | 0.047 (0, 1)                                                                 | Don't know which products are used, n(%) | 2 (18.2)     | 0 (0.0)                   | 0.746                                                                | 0.27 (0, 1)     | Reduction of inequalities and poverty, n(%)      | 4 (12.1)                              | 1 (6.7)                                                | 0.949           | 0.083 (0, 1) | Energy saving measures, n(%) | 0 (0.0)                                                                                                                                                                                    | 3 (20.0)                                                  | 0.044      | 0.383 (0, 1)       | Waste management, n(%)             | 3 (8.8)                         | 2 (11.8)                                                        | >0.999    | 0.047 (0, 1) |          |              |
|                                                                                                                  | Not coded | 31 (96.9)                                                                                                                                                                     | 18 (100.0)      |          |                    |                                           |                 |            |                    |                                                           |                            |           |                    |                                                                                                                            | 26 (76.5)       | 13 (72.2)                                    |                    |                                                                              |                                          | 9 (81.8)     | 6 (100.0)                 |                                                                      |                 |                                                  | 29 (87.9)                             | 14 (93.3)                                              |                 |              | 33 (100.0)                   | 12 (80.0)                                                                                                                                                                                  |                                                           |            | 31 (91.2)          | 15 (88.2)                          |                                 |                                                                 |           |              |          |              |
|                                                                                                                  | Coded     |                                                                                                                                                                               |                 |          |                    |                                           |                 |            |                    |                                                           |                            |           |                    | System recommendation, n(%)                                                                                                | 1 (2.9)         | 0 (0.0)                                      | >0.999             | 0.102 (0, 1)                                                                 |                                          |              |                           |                                                                      |                 |                                                  | Improving health and well-being, n(%) | 4 (12.1)                                               | 1 (6.7)         | 0.949        | 0.083 (0, 1)                 | Clean energy, n(%)                                                                                                                                                                         | 1 (3.0)                                                   | 0 (0.0)    | >0.999             | 0.098 (0, 1)                       | Reduce energy consumption, n(%) | 2 (5.9)                                                         | 1 (5.9)   | >0.999       | 0 (0, 1) |              |

|           |                                |            |            |           |              |                                   |            |           |       |              |                                     |           |           |        |              |
|-----------|--------------------------------|------------|------------|-----------|--------------|-----------------------------------|------------|-----------|-------|--------------|-------------------------------------|-----------|-----------|--------|--------------|
| Not coded | 33 (97.1)                      | 18 (100.0) | 29 (87.9)  | 14 (93.3) | 32 (97.0)    | 15 (100.0)                        | 32 (94.1)  | 16 (94.1) |       |              |                                     |           |           |        |              |
| Coded     | Fight against hunger, n(%)     | 3 (9.1)    | 2 (13.3)   | >0.999    | 0.064 (0, 1) | Applies almost all measures, n(%) | 0 (0.0)    | 1 (6.7)   | 0.683 | 0.216 (0, 1) | Consume more organic products, n(%) | 1 (2.9)   | 1 (5.9)   | >0.999 | 0.071 (0, 1) |
| Not coded |                                | 30 (90.9)  | 13 (86.7)  |           |              |                                   | 33 (100.0) | 14 (93.3) |       |              |                                     | 33 (97.1) | 16 (94.1) |        |              |
| Coded     | Climate action, n(%)           | 3 (9.1)    | 0 (0.0)    | 0.574     | 0.174 (0, 1) |                                   |            |           |       |              |                                     |           |           |        |              |
| Not coded |                                | 30 (90.9)  | 15 (100.0) |           |              |                                   |            |           |       |              |                                     |           |           |        |              |
| Coded     | Improving education, n(%)      | 2 (6.1)    | 1 (6.7)    | >0.999    | 0.012 (0, 1) |                                   |            |           |       |              |                                     |           |           |        |              |
| Not coded |                                | 31 (93.9)  | 14 (93.3)  |           |              |                                   |            |           |       |              |                                     |           |           |        |              |
| Coded     | Energy saving measures, n(%)   | 0 (0.0)    | 2 (13.3)   | 0.173     | 0.309 (0, 1) |                                   |            |           |       |              |                                     |           |           |        |              |
| Not coded |                                | 33 (100.0) | 13 (86.7)  |           |              |                                   |            |           |       |              |                                     |           |           |        |              |
| Coded     | Access to drinking water, n(%) | 2 (6.1)    | 0 (0.0)    | 0.846     | 0.141 (0, 1) |                                   |            |           |       |              |                                     |           |           |        |              |
| Not coded |                                | 31 (93.9)  | 15 (100.0) |           |              |                                   |            |           |       |              |                                     |           |           |        |              |

Data with absolute and relative values (%); 95% confidence interval (95%CI). \*significant if p< 0.05.

| Supplementary Material. Table S5. Analysis of qualitative coding.                                                |           |           |                                                                                                                                                                              |           |                                                           |           |                                                                                                                                                                                                   |           |                                                                              |           |                                                                      |           |                                                          |           |                                                                                                                                                                                            |           |
|------------------------------------------------------------------------------------------------------------------|-----------|-----------|------------------------------------------------------------------------------------------------------------------------------------------------------------------------------|-----------|-----------------------------------------------------------|-----------|---------------------------------------------------------------------------------------------------------------------------------------------------------------------------------------------------|-----------|------------------------------------------------------------------------------|-----------|----------------------------------------------------------------------|-----------|----------------------------------------------------------|-----------|--------------------------------------------------------------------------------------------------------------------------------------------------------------------------------------------|-----------|
| If you answered yes to the previous question, please, could you specify which electricity saving systems you use |           |           | If your center generates waste such as paraffin, creams, medicines, cosmetics, etc..., please? Could you specify how you carry out the removal of this waste in your center? |           | What type of heating/air conditioning systems do you use? |           | What made you consider this choice of air conditioning/heating system? Did you consider looking for a type of heating that is as sustainable as possible in relation to the environmental impact? |           | If you are aware of it, write down the cleaning products used in your clinic |           | Which of the 17 Sustainable Development Goals are you familiar with? |           | Which of these Agenda 2030 goals apply to your clinic?   |           | Would you be willing to implement the necessary sustainability measures in the clinic to further adapt to the 2040 agenda? If yes, please briefly define the measures that you would adapt |           |
| Code                                                                                                             |           |           | Code                                                                                                                                                                         |           | Code                                                      |           | Code                                                                                                                                                                                              |           | Code                                                                         |           | Code                                                                 |           | Code                                                     |           | Code                                                                                                                                                                                       |           |
| Number of coded segments                                                                                         |           |           | Number of coded segments 52                                                                                                                                                  |           | Number of coded segments 51                               |           | Number of coded segments 52                                                                                                                                                                       |           | Number of coded segments                                                     |           | Number of coded segments                                             |           | Number of coded segments                                 |           | Number of coded segments 51                                                                                                                                                                |           |
| Regulators and thermostats,n(%)                                                                                  | Coded     | 4 (8.0)   | Clean point,n(%)                                                                                                                                                             | 9 (17.3)  | Electric radiator,n(%)                                    | 7 (13.7)  | No other systems available,n(%)                                                                                                                                                                   | 7 (13.5)  | Lye,n(%)                                                                     | 4 (23.5)  | Knowledge of all objectives,n(%)                                     | 2 (4.2)   | Recycle,n(%)                                             | 2 (4.2)   | Economic and labor conditions,n(%)                                                                                                                                                         | 7 (13.7)  |
|                                                                                                                  | Not coded | 46 (92.0) |                                                                                                                                                                              | 43 (82.7) |                                                           | 44 (86.3) |                                                                                                                                                                                                   | 45 (86.5) |                                                                              | 13 (76.5) |                                                                      | 46 (95.8) |                                                          | 46 (95.8) |                                                                                                                                                                                            | 44 (86.3) |
| Timers,n(%)                                                                                                      | Coded     | 13 (26.0) | No action taken,n(%)                                                                                                                                                         | 11 (21.2) | Heat/cold pump,n(%)                                       | 22 (43.1) | No knowledge of other systems,n(%)                                                                                                                                                                | 2 (3.8)   | Disinfectants,n(%)                                                           | 6 (35.3)  | Recycle,n(%)                                                         | 3 (6.2)   | No knowledge of the measures,n(%)                        | 30 (62.5) | Will apply them but do not know what measures to adopt,n(%)                                                                                                                                | 21 (41.2) |
|                                                                                                                  | Not coded | 37 (74.0) |                                                                                                                                                                              | 41 (78.8) |                                                           | 29 (56.9) |                                                                                                                                                                                                   | 50 (96.2) |                                                                              | 11 (64.7) |                                                                      | 45 (93.8) |                                                          | 18 (37.5) |                                                                                                                                                                                            | 30 (58.8) |
| LED and energy-saving lights,n(%)                                                                                | Coded     | 44 (88.0) | Specialized company,n(%)                                                                                                                                                     | 11 (21.2) | Gas heating,n(%)                                          | 4 (7.8)   | System already installed in the plant,n(%)                                                                                                                                                        | 12 (23.1) | Ammonia,n(%)                                                                 | 1 (5.9)   | Little or no knowledge of objectives,n(%)                            | 34 (70.8) | None of the measures applied,n(%)                        | 7 (14.6)  | Laundry management,n(%)                                                                                                                                                                    | 1 (2.0)   |
|                                                                                                                  | Not coded | 6 (12.0)  |                                                                                                                                                                              | 41 (78.8) |                                                           | 47 (92.2) |                                                                                                                                                                                                   | 40 (76.9) |                                                                              | 16 (94.1) |                                                                      | 14 (29.2) |                                                          | 41 (85.4) |                                                                                                                                                                                            | 50 (98.0) |
| Use of natural light,n(%)                                                                                        | Coded     | 3 (6.0)   | Sorting containers,n(%)                                                                                                                                                      | 11 (21.2) | Central heating,n(%)                                      | 6 (11.8)  | Considered but did not install,n(%)                                                                                                                                                               | 2 (3.8)   | Soap and/or detergents,n(%)                                                  | 3 (17.6)  | Opinion that they are deficient,n(%)                                 | 1 (2.1)   | Sustainability and responsible consumption measures,n(%) | 3 (6.2)   | Would not apply any measure,n(%)                                                                                                                                                           | 6 (11.8)  |
|                                                                                                                  | Not coded | 47 (94.0) |                                                                                                                                                                              | 41 (78.8) |                                                           | 45 (88.2) |                                                                                                                                                                                                   | 50 (96.2) |                                                                              | 14 (82.4) |                                                                      | 47 (97.9) |                                                          | 45 (93.8) |                                                                                                                                                                                            | 45 (88.2) |
| No action taken,n(%)                                                                                             | Coded     | 6 (12.0)  | Do not generate biohazardous waste,n(%)                                                                                                                                      | 13 (25.0) | Air conditioning,n(%)                                     | 20 (39.2) | Cleanliness of energy source,n(%)                                                                                                                                                                 | 2 (3.8)   | Organic products,n(%)                                                        | 5 (29.4)  | Clean energy,n(%)                                                    | 3 (6.2)   | Reduction of inequalities,n(%)                           | 1 (2.1)   | Fight against climate change,n(%)                                                                                                                                                          | 1 (2.0)   |
|                                                                                                                  | Not coded | 44 (88.0) |                                                                                                                                                                              | 39 (75.0) |                                                           | 31 (60.8) |                                                                                                                                                                                                   | 50 (96.2) |                                                                              | 12 (70.6) |                                                                      | 45 (93.8) |                                                          | 47 (97.9) |                                                                                                                                                                                            | 50 (98.0) |
| Energy efficient appliances,n(%)                                                                                 | Coded     | 3 (6.0)   | Not aware of the measures taken,n(%)                                                                                                                                         | 1 (1.9)   | Biodegradable source,n(%)                                 | 1 (2.0)   | No choice raised,n(%)                                                                                                                                                                             | 9 (17.3)  | Glass cleaner,n(%)                                                           | 1 (5.9)   | Gender equality,n(%)                                                 | 3 (6.2)   | Improving health and well-being,n(%)                     | 3 (6.2)   | Social improvements,n(%)                                                                                                                                                                   | 1 (2.0)   |
|                                                                                                                  | Not coded | 47 (94.0) |                                                                                                                                                                              | 51 (98.1) |                                                           | 50 (98.0) |                                                                                                                                                                                                   | 43 (82.7) |                                                                              | 16 (94.1) |                                                                      | 45 (93.8) |                                                          | 45 (93.8) |                                                                                                                                                                                            | 50 (98.0) |
| Structural insulation,n(%)                                                                                       | Coded     | 1 (2.0)   |                                                                                                                                                                              |           |                                                           |           | Architectural conditions,n(%)                                                                                                                                                                     | 5 (9.6)   | Generic and economic products,n(%)                                           | 1 (5.9)   | Sustainability and responsible consumption,n(%)                      | 4 (8.3)   | Gender equality,n(%)                                     | 1 (2.1)   | No knowledge of the measures,n(%)                                                                                                                                                          | 15 (29.4) |
|                                                                                                                  | Not coded | 49 (98.0) |                                                                                                                                                                              |           |                                                           |           |                                                                                                                                                                                                   | 47 (90.4) |                                                                              | 16 (94.1) |                                                                      | 44 (91.7) |                                                          | 47 (97.9) |                                                                                                                                                                                            | 36 (70.6) |
| Biodegradable sources,n(%)                                                                                       | Coded     | 1 (2.0)   |                                                                                                                                                                              |           |                                                           |           | Energy efficiency and lower cost,n(%)                                                                                                                                                             | 13 (25.0) | Do not know which products are used,n(%)                                     | 2 (11.8)  | Reduction of inequalities and poverty,n(%)                           | 5 (10.4)  | Energy saving measures,n(%)                              | 3 (6.2)   | Waste management,n(%)                                                                                                                                                                      | 5 (9.8)   |
|                                                                                                                  | Not coded | 49 (98.0) |                                                                                                                                                                              |           |                                                           |           |                                                                                                                                                                                                   | 39 (75.0) |                                                                              | 15 (88.2) |                                                                      | 43 (89.6) |                                                          | 45 (93.8) |                                                                                                                                                                                            | 46 (90.2) |
|                                                                                                                  |           |           |                                                                                                                                                                              |           |                                                           |           | System recommendation,n(%)                                                                                                                                                                        | 1 (1.9)   |                                                                              |           | Improving health and well-being,n(%)                                 | 5 (10.4)  | Clean energy,n(%)                                        | 1 (2.1)   | Reduce energy consumption,n(%)                                                                                                                                                             | 3 (5.9)   |
|                                                                                                                  |           |           |                                                                                                                                                                              |           |                                                           |           |                                                                                                                                                                                                   | 51 (98.1) |                                                                              |           |                                                                      | 43 (89.6) |                                                          | 47 (97.9) |                                                                                                                                                                                            | 48 (94.1) |
|                                                                                                                  |           |           |                                                                                                                                                                              |           |                                                           |           |                                                                                                                                                                                                   |           |                                                                              |           | Fight against hunger,n(%)                                            | 5 (10.4)  | Applies almost all measures,n(%)                         | 1 (2.1)   | Consuming more organic products,n(%)                                                                                                                                                       | 2 (3.9)   |
|                                                                                                                  |           |           |                                                                                                                                                                              |           |                                                           |           |                                                                                                                                                                                                   |           |                                                                              |           |                                                                      | 43 (89.6) |                                                          | 47 (97.9) |                                                                                                                                                                                            | 49 (96.1) |
|                                                                                                                  |           |           |                                                                                                                                                                              |           |                                                           |           |                                                                                                                                                                                                   |           |                                                                              |           | Climate action,n(%)                                                  | 3 (6.2)   |                                                          |           |                                                                                                                                                                                            |           |
|                                                                                                                  |           |           |                                                                                                                                                                              |           |                                                           |           |                                                                                                                                                                                                   |           |                                                                              |           |                                                                      | 45 (93.8) |                                                          |           |                                                                                                                                                                                            |           |
|                                                                                                                  |           |           |                                                                                                                                                                              |           |                                                           |           |                                                                                                                                                                                                   |           |                                                                              |           | Improve education,n(%)                                               | 3 (6.2)   |                                                          |           |                                                                                                                                                                                            |           |
|                                                                                                                  |           |           |                                                                                                                                                                              |           |                                                           |           |                                                                                                                                                                                                   |           |                                                                              |           |                                                                      | 45 (93.8) |                                                          |           |                                                                                                                                                                                            |           |

|  |                                    |           |
|--|------------------------------------|-----------|
|  |                                    |           |
|  | Energy saving measu-<br>res,n(%)   | 2 (4.2)   |
|  |                                    | 46 (95.8) |
|  | Access to drinking wa-<br>ter,n(%) | 2 (4.2)   |
|  |                                    | 46 (95.8) |

Data with absolute and relative values (%).
